# Supplementary material
Source: PubMed Central journal article supplement (PMC6679766)
Supplement: NIHMS1529290-supplement-1.pdf [file NIHMS1529290-supplement-1.pdf]

## Supplementary Figure S1

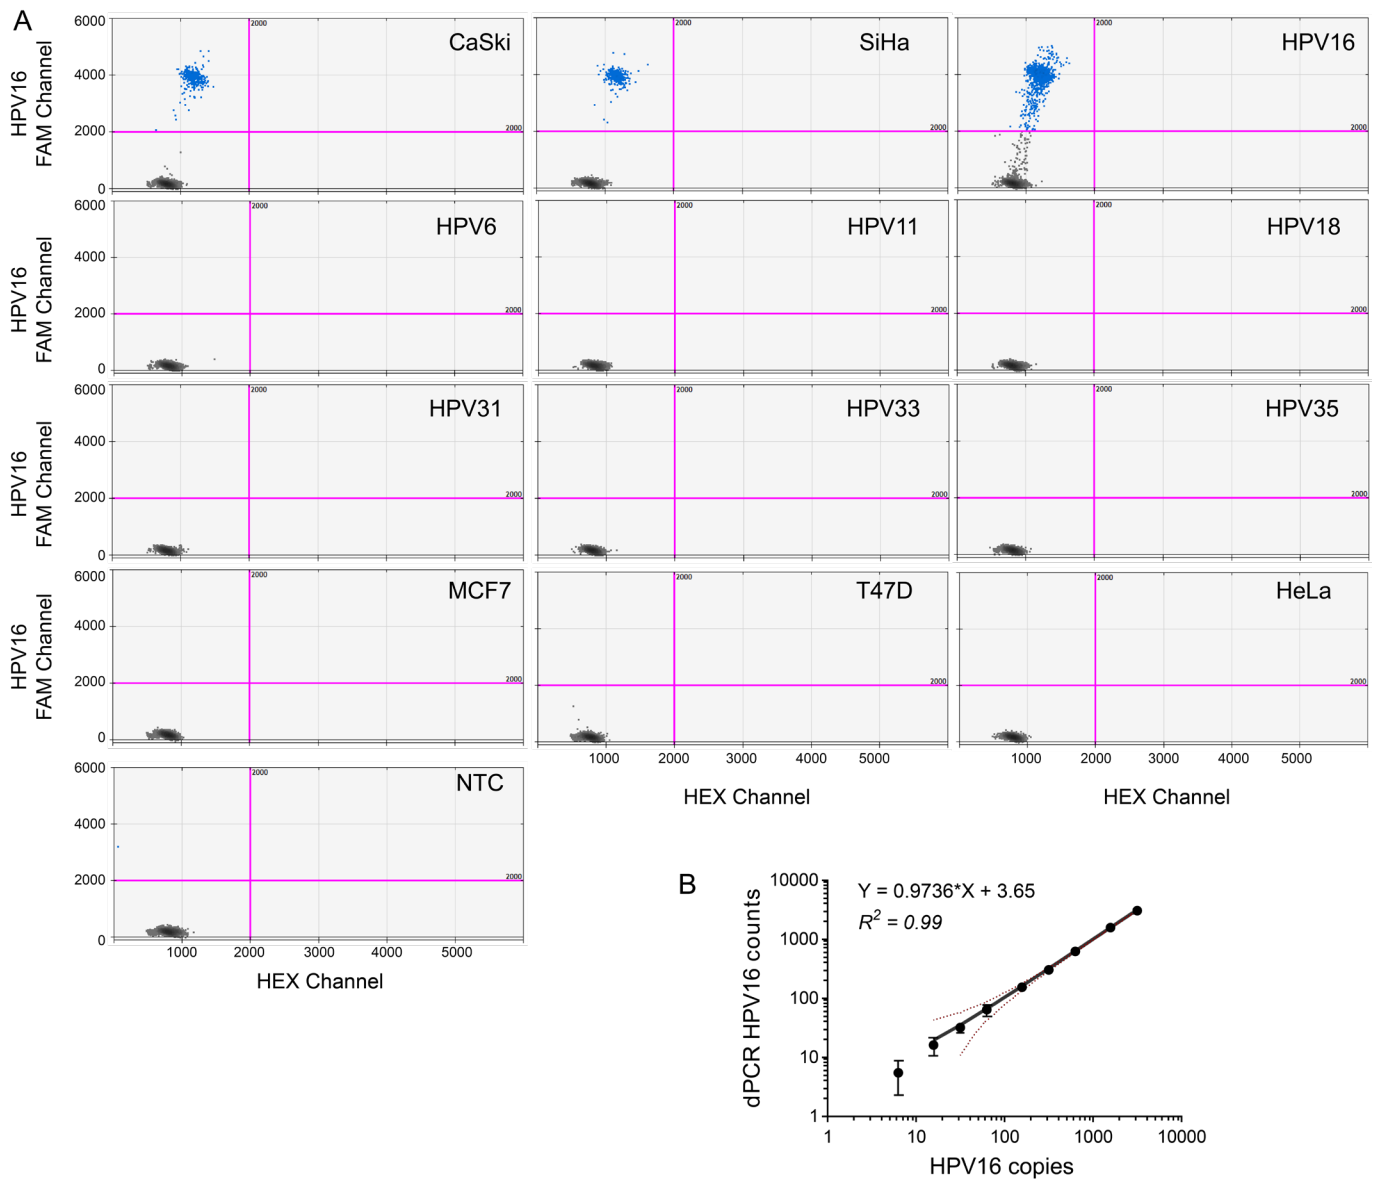

**Supplementary Figure S1. Specificity, sensitivity and linearity of HPV16 dPCR assay.** (A) Specific detection of HPV16 in the genomic DNA from HPV16 positive CaSki and SiHa cell lines and HPV16 plasmid controls. The assay does not cross-detect other HPV subtypes including HPV-6, -11, -18, -31, -33, or 35. (B) Highly sensitive detection of HPV16 copies by dPCR assay in a titration analysis by spiking sheared genomic DNA from MCF7 cells with varying amounts of HPV16 control plasmid DNA.
