# Supplementary material
Source: PubMed Central journal article supplement (PMC6679766)
Supplement: NIHMS1529290-supplement-2.pdf [file NIHMS1529290-supplement-2.pdf]

## Supplementary Figure S2

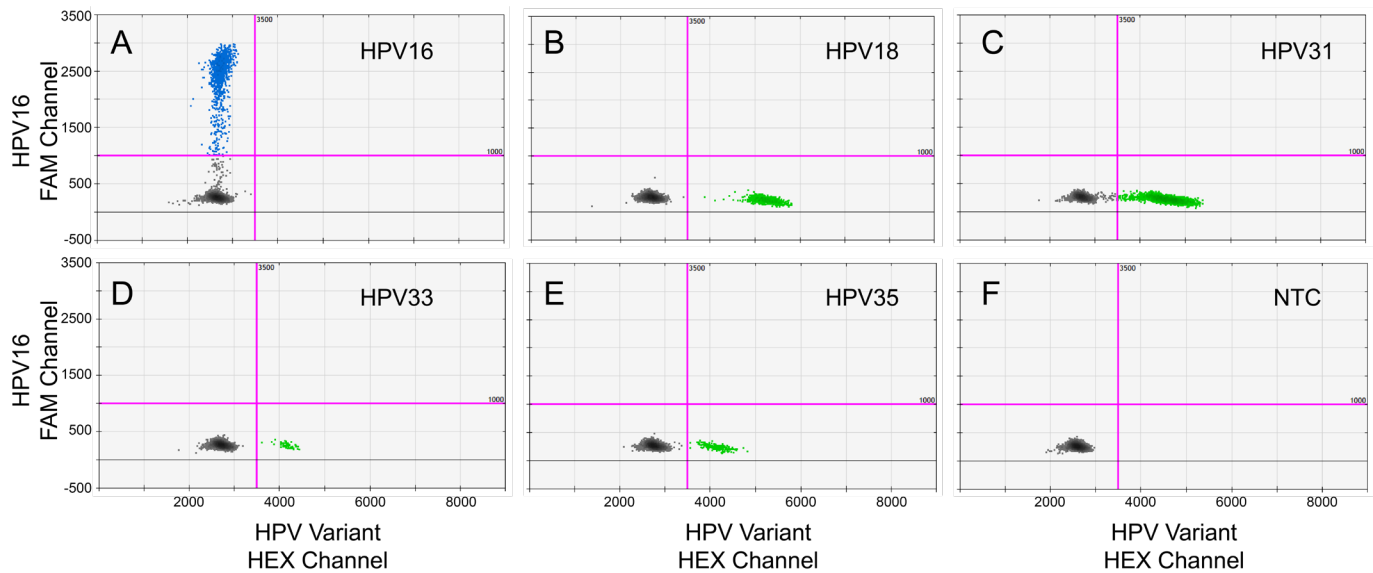

**Supplementary Figure S2. Multiplexed dPCR assay for non-16 HPV strains.** Detection of additional HPV strains using a multiplexed dPCR assay. The multiplexed reaction includes forward and reverse primers and probes specific for the E7 gene encoded by six high-risk HPV subtypes: HPV16, HPV18, HPV31, HPV33, and HPV35. A FAM-conjugated probe is used for the HPV16 assay, whereas HEX-conjugated probes are used to detect all other HPV strains. The multiplexed assay specifically detects synthetic positive control DNA from (A) HPV16-E7, (B) HPV18-E7, (C) HPV 31, (D) HPV33, and (E) HPV35.
