# Supplementary material
Source: PubMed Central journal article supplement (PMC6679766)
Supplement: NIHMS1529290-supplement-3.pdf [file NIHMS1529290-supplement-3.pdf]

### Supplementary Figure S3

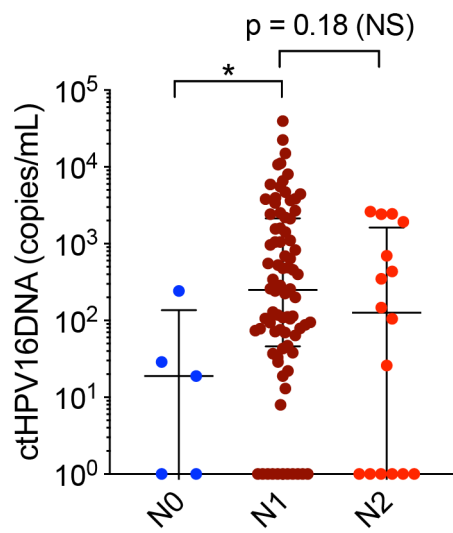

**Supplementary Figure S3. Baseline ctHPV16DNA levels stratified by AJCC 8<sup>th</sup> edition N staging.**

\*,  $p < 0.05$ ; P values calculated using a two-tailed Mann-Whitney test.
