# Supplementary material
Source: PubMed Central journal article supplement (PMC6679766)
Supplement: NIHMS1529290-supplement-4.pdf [file NIHMS1529290-supplement-4.pdf]

## Supplementary Figure S4

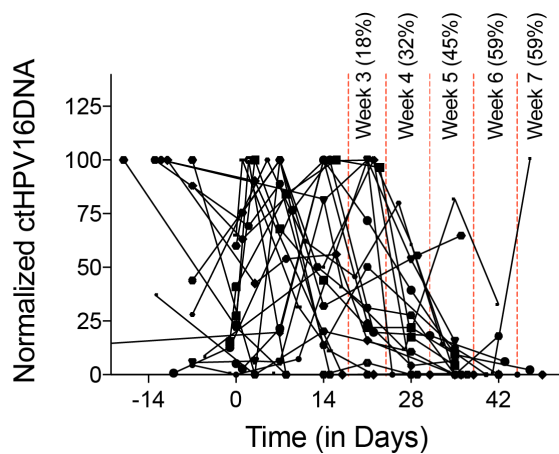

**Supplementary Figure S4. Labile ctHPV16DNA clearance kinetics in patients with low ( $\leq 200$  copies/mL) baseline ctHPV16DNA levels.** Normalized ctHPV16DNA levels for patients with low pre-treatment ctHPV16DNA levels, defined as  $\leq 200$  copies/mL (N=27). Due to the notably complex clearance kinetics for these patients, the analysis of Week 4 ctHPV16DNA clearance was restricted to patients with  $>200$  copies/mL at baseline.
