# Supplementary material
Source: PubMed Central journal article supplement (PMC6679766)
Supplement: NIHMS1529290-supplement-6.pdf [file NIHMS1529290-supplement-6.pdf]

**Supplementary Table S1: Primers, probes, plasmids and gBlocks used in the HPV assay**

| Assay          | Sequence (5'-3')                                                                                                                                                                                                                               | Amplicon | T <sub>m</sub> (°C) <sup>a</sup> |
|----------------|------------------------------------------------------------------------------------------------------------------------------------------------------------------------------------------------------------------------------------------------|----------|----------------------------------|
| HPV16 (E7)     | Forward: TGACTCTACGCTTCGGTTG<br>Reverse: GCCCATTAACAGGTCTTCC<br>Probe: CGTACAAAGCACACACGTAGACATTCGTAC<br>(FAM-ZEN probe)                                                                                                                       | 73 bp    | 61.7<br>60.4<br>68.1             |
| HPV18          | Forward: TGAAGCCAGAATTGAGCTAG<br>Reverse: AGGACAGGGTGTTTCAGAA<br>Probe: CA+GA+C+GAC+CTTCG (LNA HEX probe)                                                                                                                                      | 83 bp    | 60.0<br>60.4<br>67.2             |
| HPV31          | Forward: AGCACACAAGTAGATATTCGC<br>Reverse: TAGTAGAACAGTTGGGGCA<br>Probe: TAA+C+AG+CT+C+TTG+C (LNA HEX probe)                                                                                                                                   | 79 bp    | 60.6<br>60.6<br>67.5             |
| HPV33          | Forward: TAACACCACAGTTCGTTTATGT<br>Reverse: ACAATATTCAGTGTGCCATA<br>Probe: TG +AC+C +TA+CG +A+ACC (LNA HEX probe)                                                                                                                              | 87 bp    | 60.7<br>60.1<br>67.3             |
| HPV35          | Forward: TGAGGCGACACTACGTC<br>Reverse: GTGCCATTAATAAATCTTCCAA<br>Probe: AG+AG+C+ACA+C+ACAT (LNA HEX probe)                                                                                                                                     | 75 bp    | 60.7<br>60.1<br>68.0             |
| <i>ESR1</i> WT | Forward: ATCTGTACAGCATGAAGTGCAAGA<br>Reverse: CTAGTGGGCGCATGTAGGC<br>Probe: T+C+T +AT+G +A+CC TG (LNA HEX or LNA TET probe)                                                                                                                    | 91 bp    | 64.7<br>64.7<br>61.04            |
| <b>Control</b> | <b>Details</b>                                                                                                                                                                                                                                 |          |                                  |
| HPV16          | HPV16 genome plasmid of 2686 bp                                                                                                                                                                                                                |          |                                  |
| HPV16 E7       | gBlock:5'AATATTGTAACCTTTTGTGTTGCAAGTGTGACTCTACGCTTCGGTTGTG<br>CGTACAAAGCACACACGTAGACATTCGTACTTTGGAAGACCTGTTAATGGG<br>CACACTAGGAATTGTGTGCCCATCTG3' (This sequence was synthesized by IDT<br>and cloned into TA vector to get 4083 bp plasmid)   |          |                                  |
| HPV16 L1       | gBlock:5'AGGCACACTAGAAGATACTTATAGGTTTGTAAACATCCCAGGCAATT<br>GCTTGTCAAAAACATACACCTCCAGCACCTAAAGAAGATCCCCTTAAAAAA<br>TACACTTTTTGGGAAGTAAATTTAAAAG3' (This sequence was synthesized by<br>IDT and cloned into TA vector to get 4083 bp plasmid)   |          |                                  |
| HPV18          | HPV18 genome plasmid of 8314 bp                                                                                                                                                                                                                |          |                                  |
| HPV31          | HPV31 genome plasmid of ~12 kb                                                                                                                                                                                                                 |          |                                  |
| HPV33          | gBlock:5'TACATTGTAACCTGTTGTCACACTTGTAAACACCACAGTTCGTTTATG<br>TGTC AACAGTACAGCAAGTGACCTACGAACCATAACAGCAACTACTTATGGG<br>CACAGTGAATATTGTGTGCCCTACCTG3' (This sequence synthesized was by IDT<br>and cloned into TA vector to get 4083 bp plasmid) |          |                                  |
| HPV35          | gBlock:5'ATATTGTAACGTCCTGTTGTAAATGTGAGGCGACACTACGTCTGTG<br>TGTACAGAGCACACACATTGACATACGTAAATTGGAAGATTTATTAATGGG<br>CACATTTGGAATAGTGTGCCCGGCTGT3' (This sequence was synthesized by<br>IDT and cloned into TA vector to get 4083 bp plasmid)     |          |                                  |

<sup>a</sup>The melting temperatures (T<sub>m</sub>) were predicted using DNA Thermodynamics and Hybridization and

OligoAnalyzer tools at IDT's website.
